# Supplementary material for: Host BAG3 Is Degraded by Pseudorabies Virus pUL56 C-Terminal 181L-185L and Plays a Negative Regulation Role during Viral Lytic Infection
Source: MDPI journal article supplement (doi:10.3390/ijms21093148), 2020-04-29
Supplement: s1 [file s1]

Supplementary information

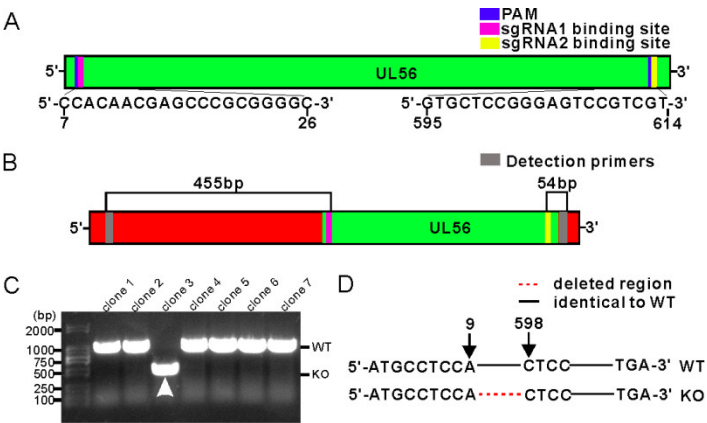

**Figure S1. Construction and characterization of  $\Delta$ UL56 PRV.** (A) The PAM site-based sgRNAs are designed to target to 5'- and 3'-end of the *UL56* gene, respectively. (B) A pair of primers is used to detect the removal of *UL56* gene in PRV genome by PCR. (C) Clone 3 is a plaque-purified virus whose *UL56* gene has been successfully deleted. (D) DNA sequencing identifies the cleavage site (arrows) in the *UL56* gene of clone 3.

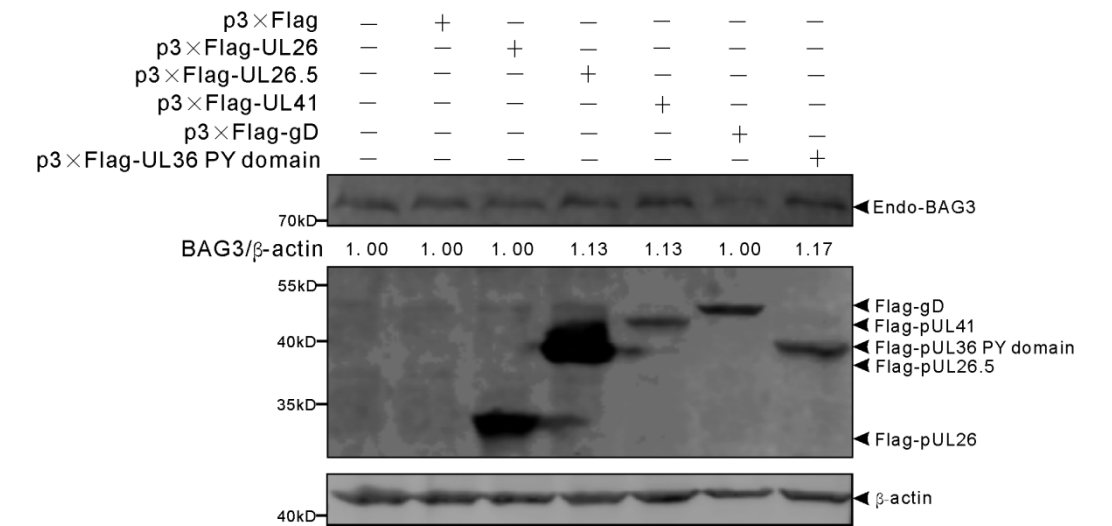

**Figure 2. Expression of endogenous BAG3 cannot be modulated by the PPxY motif containing PRV proteins.** The recombinant plasmids expressing PPxY motif containing PRV proteins pUL26, pUL26.5, pUL41, gD and pUL36 PY domain (1  $\mu$ g per plasmid) are transfected into HEK293T cells, respectively. At 48 hpt, the endogenous BAG3 is detected with an anti-BAG3 polyclonal antibody, and the relative expression levels of BAG3/β-actin are analyzed using ImageJ.
