# Supplementary figures and images for: Host BAG3 Is Degraded by Pseudorabies Virus pUL56 C-Terminal 181L-185L and Plays a Negative Regulation Role during Viral Lytic Infection
Source: MDPI journal article supplement (doi:10.3390/ijms21093148), 2020-04-29

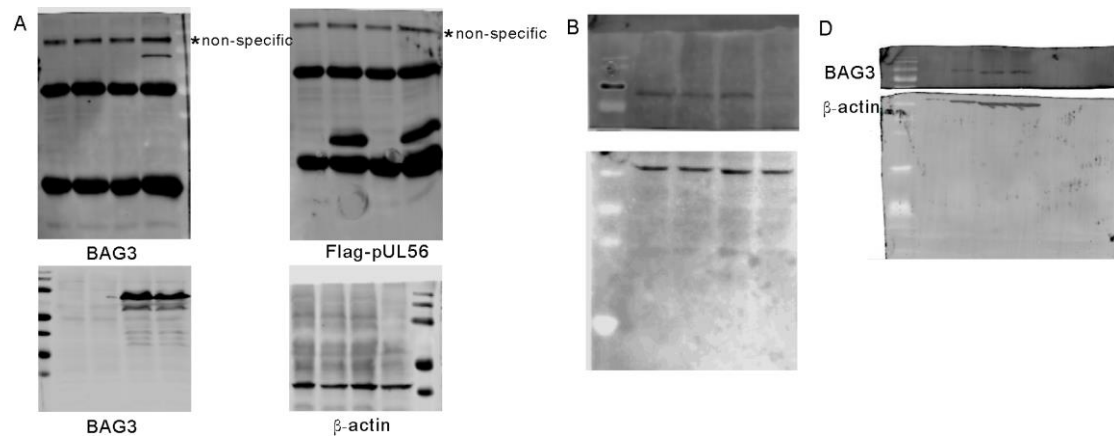

**Figure 1**

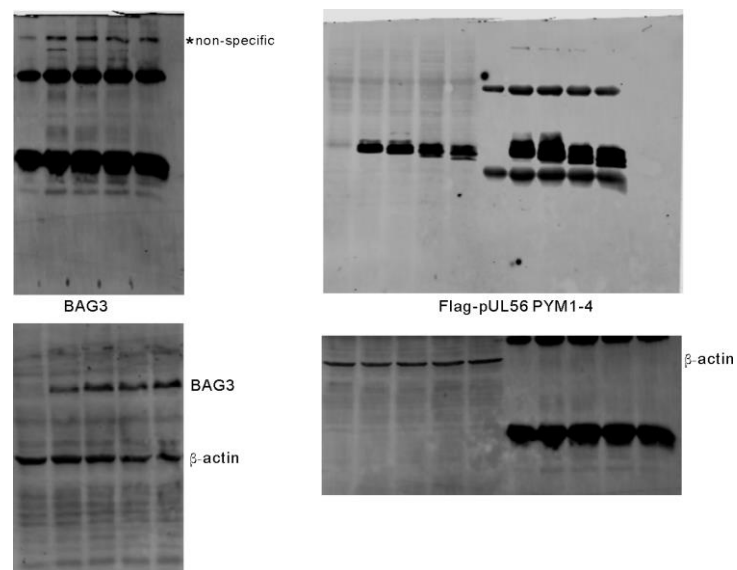

**Figure 2**

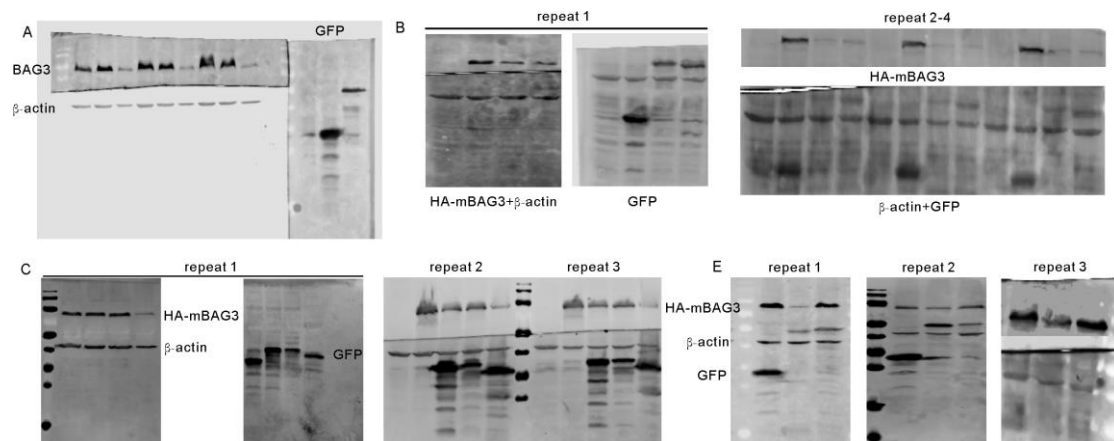

**Figure 4**

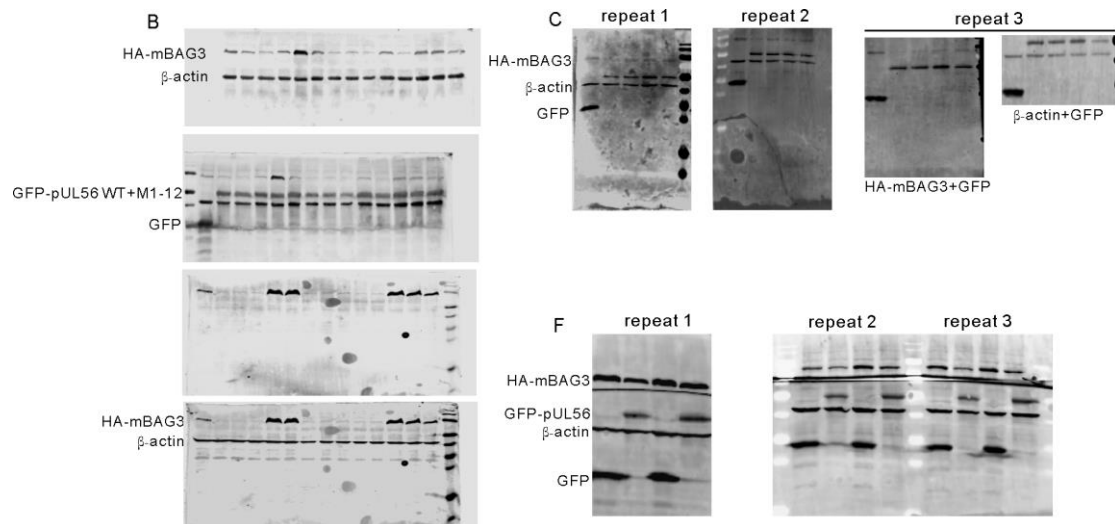

**Figure 5**

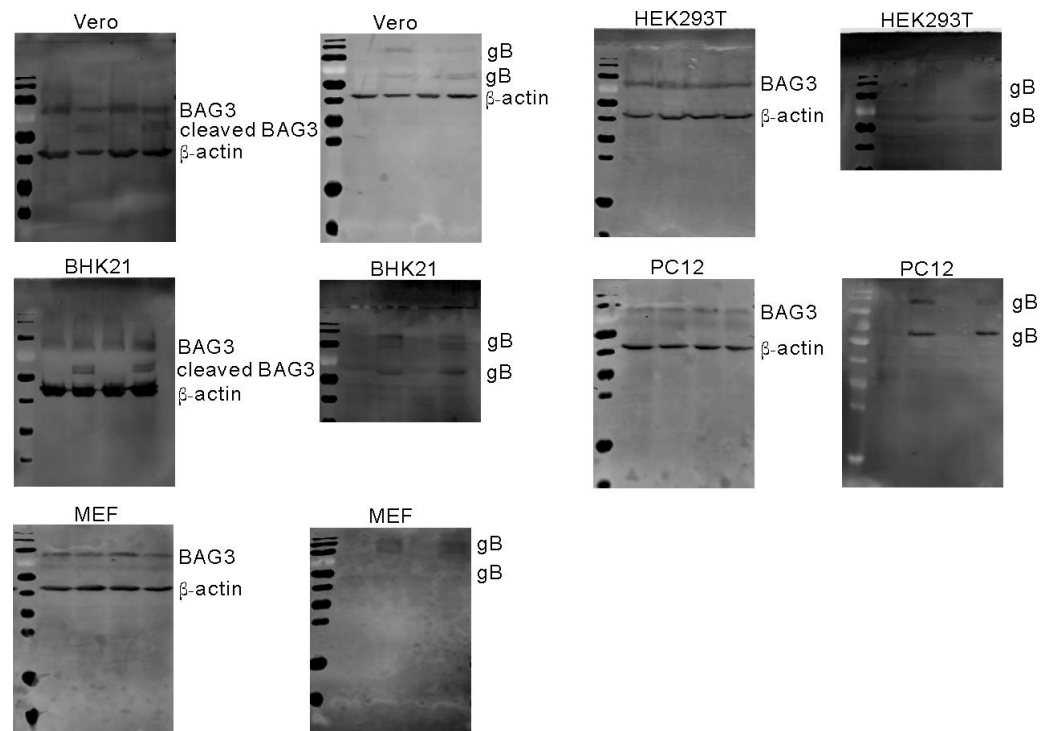

**Figure 6**

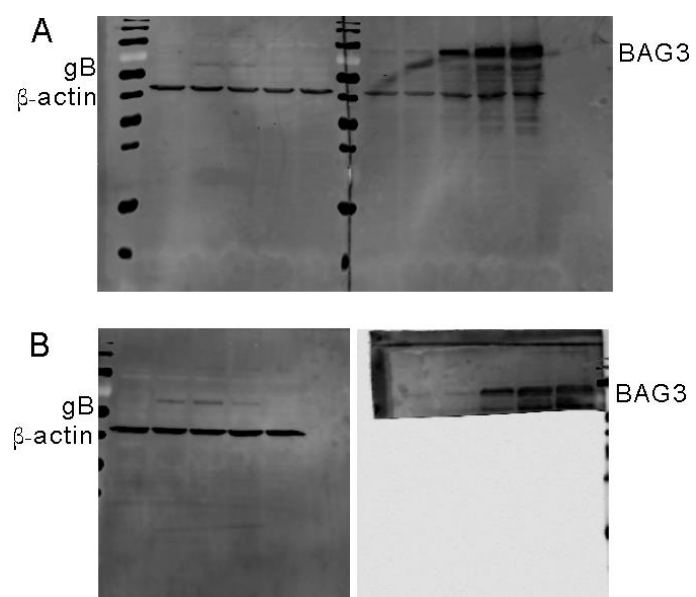

**Figure 7**

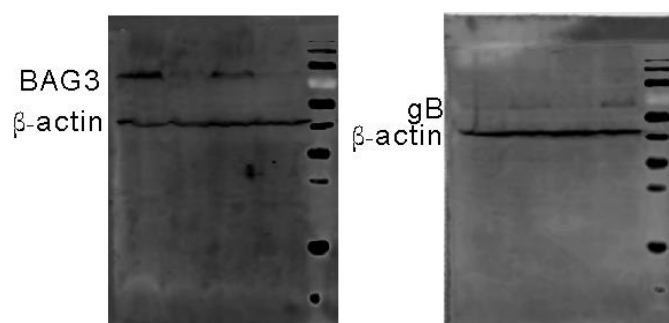

**Figure 8**

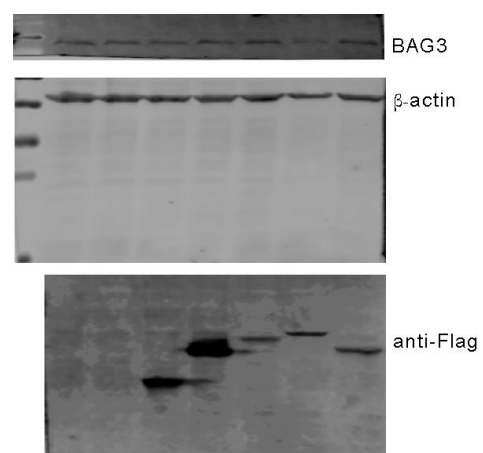

**Figure S1**

Supplement: s1 [file s1]
